# Supplementary material
Source: PubMed Central journal article supplement (PMC9926354)
Supplement: jamaneurol-e225346-s001.pdf [file jamaneurol-e225346-s001.pdf]

## Data Sharing Statement

Handel. Changes in the Rate of Leucine-Rich Glioma-Inactivated 1 Seropositivity During the COVID-19 Lockdown. *JAMA Neurol.* Published February 13, 2023.

doi:10.1001/jamaneurol.2022.5346

### Data

**Data available:** Yes

**Data types:** Deidentified participant data

**How to access data:** [adam.handel@ndcn.ox.ac.uk](mailto:adam.handel@ndcn.ox.ac.uk)

**When available:** With publication

### Supporting Documents

**Document types:** None

### Additional Information

**Who can access the data:** Researchers whose proposed use of the data has been approved.

**Types of analyses:** For academic research.

**Mechanisms of data availability:** Data will be available on reasonable request to the authors.
